# Supplementary material
Source: MDPI journal article supplement (https://www.mdpi.com/2073-4395/11/12/2528)

**Supplementary Table S1:** Average grain protein content of 26 NAM families across the three environments planted at Spillman Agronomy Farm, Pullman, WA.

| Parental Information |             |               |              | GPC (%) of NAM families |       |       |                    |
|----------------------|-------------|---------------|--------------|-------------------------|-------|-------|--------------------|
| ID                   | Accession   | Status        | Origin       | GPC14                   | GPC15 | GPC16 | Standard deviation |
| 1                    | PI185715    | Landrace      | Portugal     | 15.0                    | 13.3  | 12.4  | 2.41               |
| 2                    | PI283147    | Landrace      | Jordan       | 14.5                    | 12.1  | 12.5  | 2.58               |
| 3                    | PI220431    | Landrace      | Egypt        | 14.1                    | 12.1  | 11.1  | 2.50               |
| 4                    | CItr11223   | Landrace      | Croatia      | 14.7                    | 12.1  | 12.5  | 2.34               |
| 5                    | VIDA        | Cultivar      | USA          | 14.5                    | 11.2  | 11.4  | 2.53               |
| 6                    | PBW343      | Cultivar      | India        | 14.3                    | 12.9  | 12.1  | 2.67               |
| 7                    | PI192569    | Breeding Line | Mozambique   | 13.5                    | 12.0  | 12.1  | 1.15               |
| 8                    | Dharwar Dry | Breeding Line | Mexico       | 13.3                    | 11.1  | 11.4  | 1.22               |
| 9                    | PI9791      | Landrace      | Uzbekistan   | 14.5                    | 11.8  | 12.7  | 2.40               |
| 10                   | PI43355     | Landrace      | Uruguay      | 14.1                    | 12.6  | 13.5  | 1.24               |
| 11                   | PI262611    | Landrace      | Turkmenistan | 14.26                   | 11.9  | 12.2  | 2.50               |
| 12                   | PI82469     | Landrace      | North Korea  | 13.7                    | 11.3  | 11.9  | 2.44               |
| 13                   | PI278297    | Landrace      | Greece       | 14.6                    | 12.7  | 12.4  | 2.61               |
| 14                   | PI565213    | Landrace      | Bolivia      | 14.2                    | 11.5  | 12.2  | 2.35               |
| 15                   | PI94567     | Landrace      | Israel       | 15.6                    | 12.5  | 11.9  | 2.62               |
| 16                   | CItr15134   | Landrace      | Pakistan     | 13.8                    | 11.2  | 12.2  | 2.49               |
| 17                   | PI210945    | Landrace      | Cyprus       | 14.8                    | 13.7  | 13.4  | 1.02               |
| 18                   | PI192001    | Landrace      | Angola       | 13.4                    | 11.6  | 12.2  | 1.16               |
| 19                   | PI572692    | Landrace      | Georgia      | 15.0                    | 13.1  | 13.2  | 2.38               |
| 20                   | PI382150    | Landrace      | Japan        | 14.9                    | 12.9  | 12.9  | 2.68               |
| 21                   | PI192147    | Landrace      | Ethiopia     | 14.8                    | 12.2  | 12.6  | 2.71               |
| 22                   | CItr4175    | Landrace      | Philippines  | 14.2                    | 12.7  | 13.5  | 1.18               |
| 23                   | PI8813      | Landrace      | Iraq         | 14.4                    | 12.1  | 12.0  | 2.32               |
| 24                   | PI366716    | Landrace      | Afghanistan  | 13.9                    | 12.1  | 12.4  | 2.36               |
| 25                   | CItr15144   | Landrace      | Saudi Arabia | 14.0                    | 12.8  | 13.7  | 1.14               |
| 26                   | PI470817    | Landrace      | Algeria      | 14.9                    | 12.1  | 12.6  | 2.46               |

**Supplementary Table S2.** Phenotypic description and broad sense heritability of the grain protein content across the three environments (2014-16)

| Environment | Grain protein content |             |             | Heritability |
|-------------|-----------------------|-------------|-------------|--------------|
|             | Mean (%)              | Minimum (%) | Maximum (%) |              |
| 2014        | 14.3                  | 11.2        | 18.0        | 0.62         |
| 2015        | 12.2                  | 8.7         | 16.8        | 0.36         |
| 2016        | 12.5                  | 9.7         | 17.0        | 0.68         |

**Supplementary Table S3:** Average grain protein content and standard deviation for families selected to have less variation. The origin represents countries of the NAM population founder parents.

| ID | Parental Information |              | GPC (%) of NAM families |      |      |                    |
|----|----------------------|--------------|-------------------------|------|------|--------------------|
|    | Accession            | Origin       | 2014                    | 2015 | 2016 | Standard deviation |
| 1  | PI210945             | Cyprus       | 14.8                    | 13.7 | 13.4 | 1.02               |
| 2  | CItr15144            | Saudi Arabia | 14.0                    | 12.8 | 13.7 | 1.14               |
| 3  | PI92569              | Mozambique   | 13.5                    | 12.0 | 12.7 | 1.15               |
| 4  | PI92001              | Angola       | 13.4                    | 11.6 | 12.2 | 1.16               |
| 5  | CItr4175             | Philippines  | 14.2                    | 12.7 | 13.5 | 1.18               |
| 6  | Dharwar Dry          | Mexico       | 13.3                    | 11.1 | 11.4 | 1.22               |
| 7  | PI43355              | Uruguay      | 14.1                    | 12.6 | 13.5 | 1.24               |

**Supplementary Figure S1:** Distribution of average GPC for environments 2014, 2015, and 2016. The X-axis shows the environments, namely, 2014, 2015, and 2016, the Y-axis shows the density of individuals.

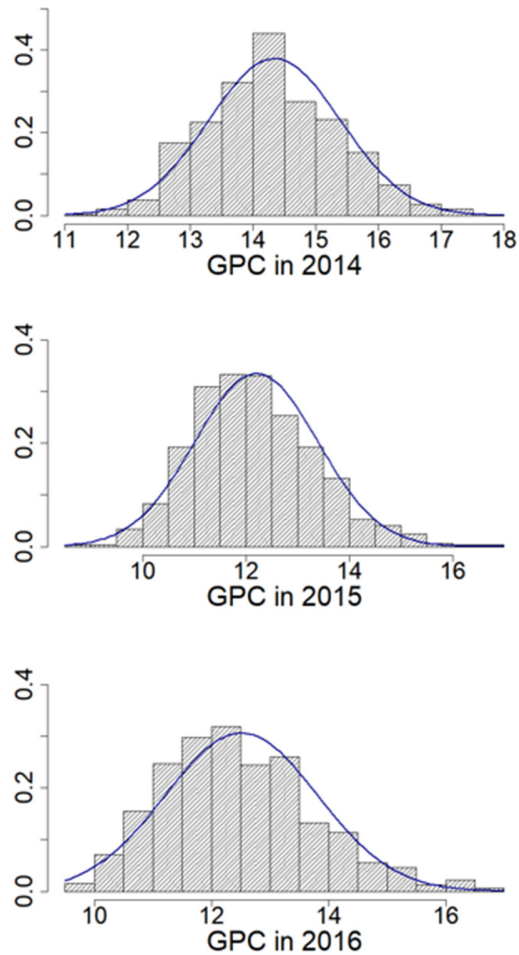

**Supplementary Figure S2:** Variation explained in the NAM<sub>175</sub> population by each principal component obtained in this study.

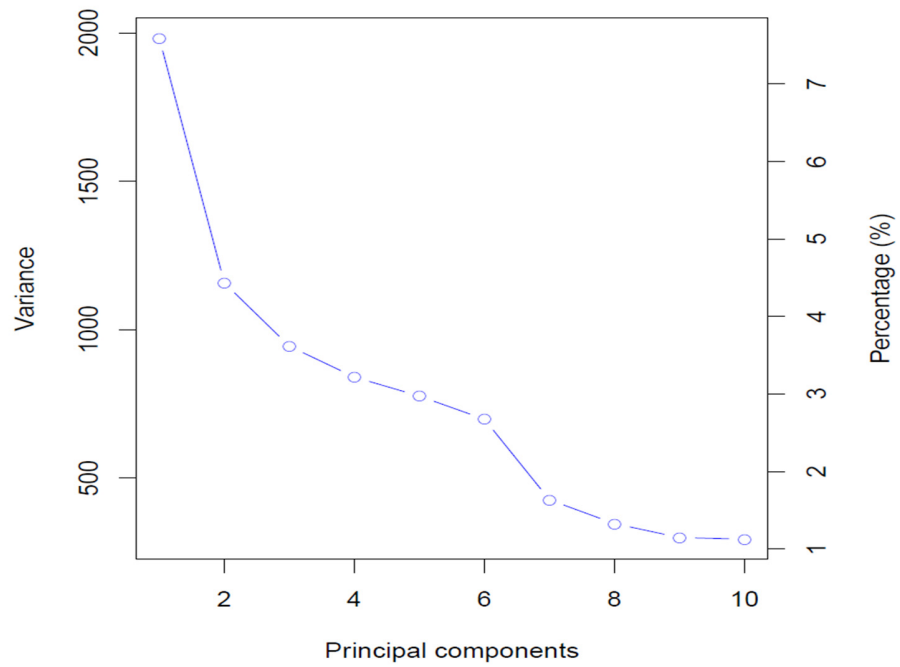

**Supplementary Figure S3:** Population structure inferred from principal component analysis and illustrated with the first three principal component's.

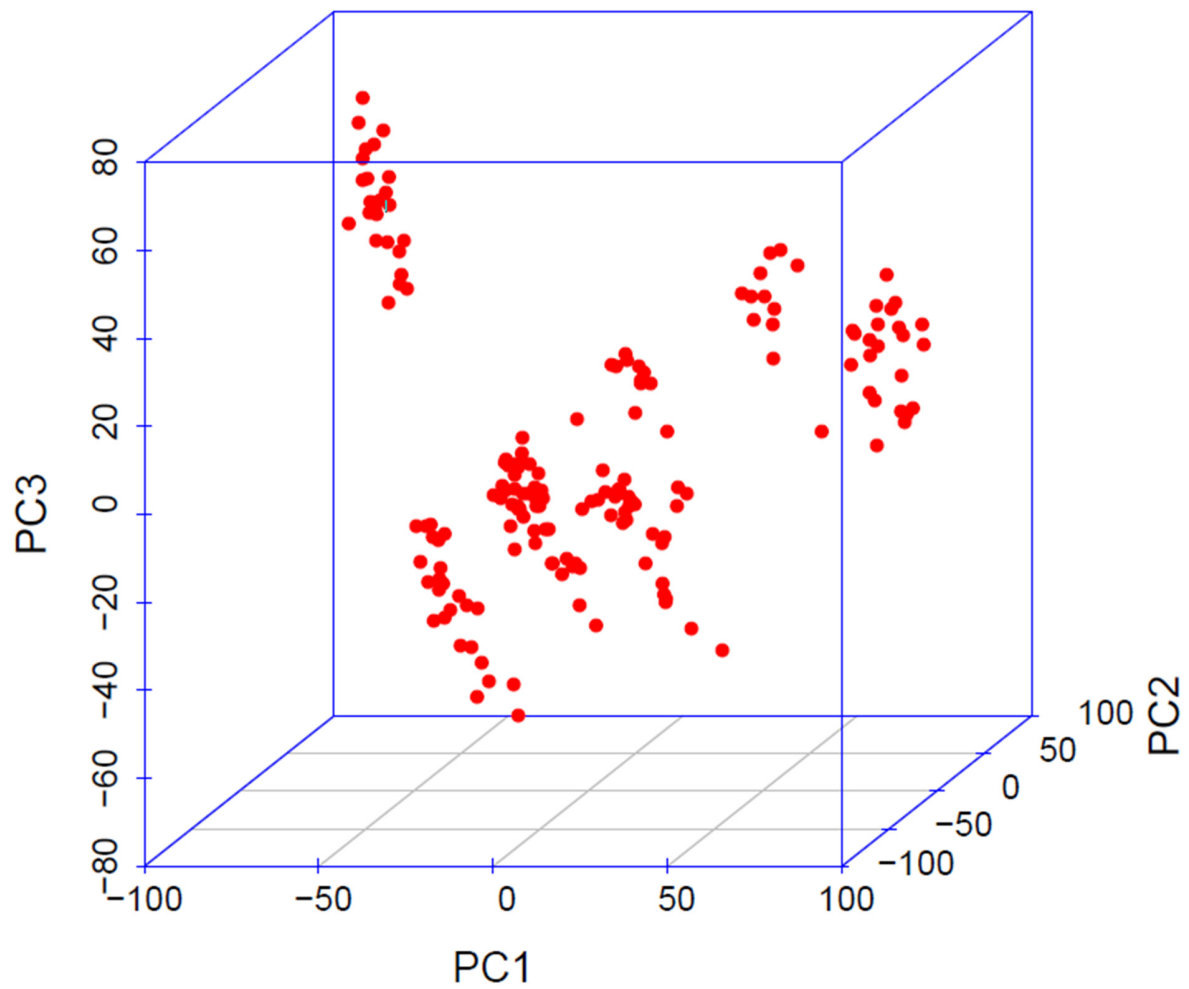

**Supplementary Figure S4:** Manhattan plot representing the position of significant markers controlling the grain protein content stability. The threshold used for the significant association is a Bonferroni correction of 0.05 (A). Quantile-Quantile (Q-Q) plot of marker-trait association study using different principal components as a covariate in the BLINK model for grain protein content stability (B).

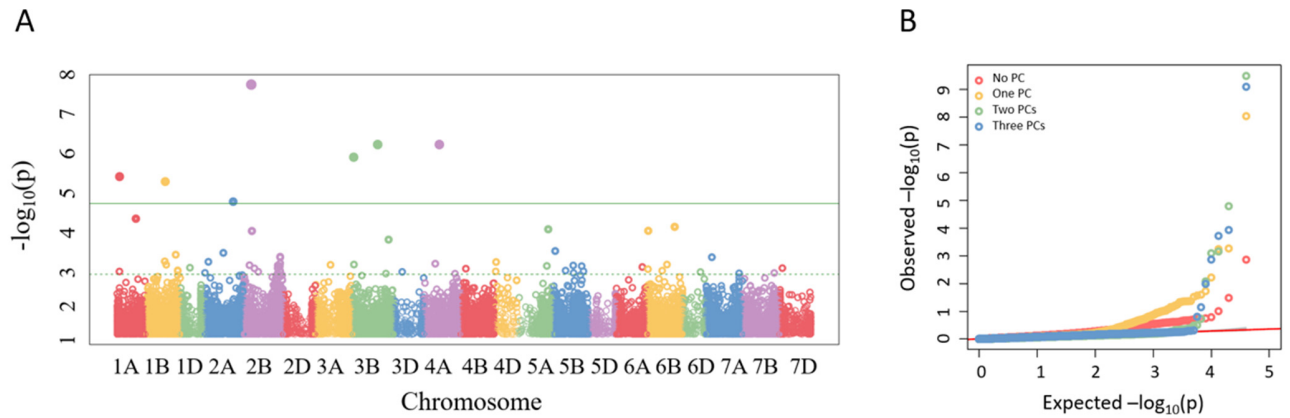

**Supplementary Figure S5:** Manhattan plot representing the position of significant markers controlling the grain protein content. The threshold used for significant association is a Bonferroni correction of 0.05 (A). Quantile-Quantile (Q-Q) plot of marker-trait association study using different principal components as a covariate in the BLINK model for grain protein content (B).

A

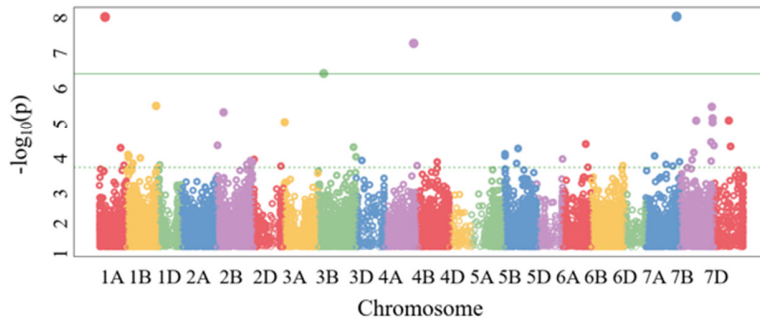

B

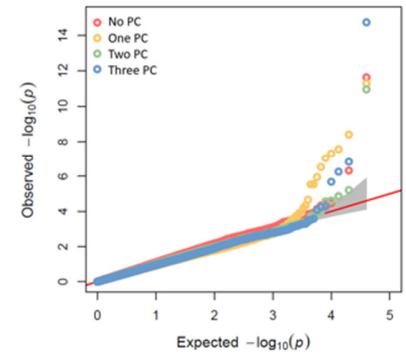



**Supplementary Figure S6:** Linkage disequilibrium analysis on the population using complete set of the marker data.

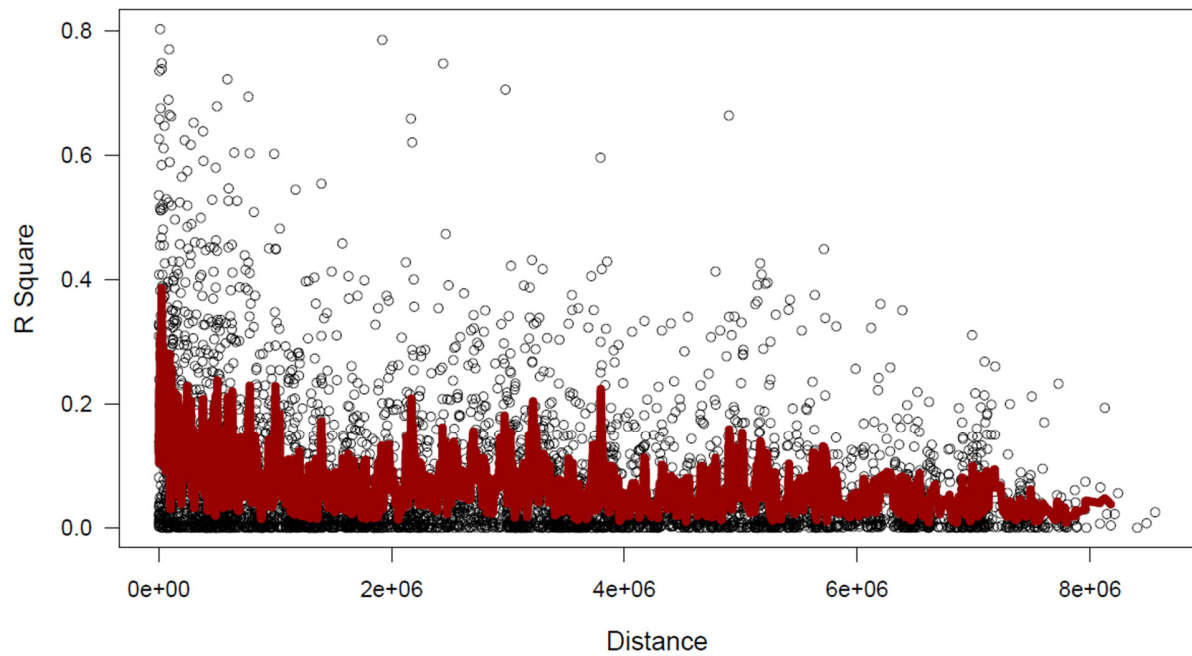

Supplement: s1 [file s1]
